# Supplementary material for: Spatiotemporal dynamics of soil phosphorus and crop uptake in global cropland during the twentieth century
Source: Copernicus journal article supplement (doi:10.5194/bg-2016-543), 2017-01-04
Supplement: Supplementary file 1 [file Zhang_Table_S4.xlsx]

## Sheet: Table SI4
LP-1950	Canada	USA	Mexico	Rest_Central_America	Brazil	Rest_South_America	Northern_Africa	Western_Africa	Eastern_Africa	South_Africa	Western_Europe	Central_Europe	Turkey	Ukraine_region	Central_Asia	Russia+	Middle_East	India+	Korea	China+	South_East_Asia	Indonesia	Japan	Oceania	Rest_Southern_Asia	Rest_Southern_Africa	World	France	NL
μLS	0.0185724	0.0520336	0.0190209	0.012786	-0.00594047	-0.0220128	0.0565228	0.00177355	0.00531699	0.0841459	0.147992	-0.026263	0.0336911	0.030366	0.119996		0.0363527	0.0414987	0.114613	-0.067344	-0.0190627	-0.0164142	0.452958	0.283457	0.0324338	0.00619474	0.0402024	0.10393	0.531395
fr_weathering	0.0573899	0.0485605	0.0409718	0.0192379	0.033002	0.0436047	0.0325414	0.0231519	0.0235476	0.0353913	0.0254574	0.0342149	0.0437438	0.0437768	0.0603898	0.0489306	0.0342	0.0427191	0.021101	0.0289611	0.0211289	0.0322274		0.0363047	0.0455768	0.0237225	0.0381474	0.0318314
fs	0.0114233	0.0628226		0.00632292	0.00530862	0.0121797	0.00814395			0.0324987	0.0778909	0.0199785		0.0340377	0.0321271	0.0168056			0.0923012				0.239621	0.10922			0.0251015	0.0654052	0.215044
fm	0.00477743	0.0116724	0.0160566	0.0348476	0.0299696	0.0283283	0.0238851	0.00501688	0.0062103	0.00917537	0.0232707	0.0275656	0.0296397	0.0312117	0.0246075	0.0149358	0.0192992	0.0469403	0.0409199	0.0156916	0.0363801	0.0265764	0.0820661		0.0521129	0.00636819	0.0238915	0.0177814	0.0495714
agri_2_natural_years																							0.0182128
max_uptake	-0.0602636	-0.139793	-0.0435484	-0.0465925	-0.0661969	-0.0793285	-0.0150802	-0.0219611	-0.020118	-0.0307263	-0.0934808	-0.102685	-0.0442707	-0.10514	-0.0419373	-0.0708794	-0.015669	-0.0541135	-0.144518	-0.113168	-0.090387	-0.119045	-0.167378	-0.0328729	-0.0719918	-0.0198083	-0.074913	-0.0988703	-0.0976146
fr_mobile	-0.0172736	-0.0384164	-0.0104646	-0.0350788	-0.01629	-0.0520886	-0.0118542	-0.00867234	-0.00713743	-0.0146158	-0.0265183	-0.0459872	-0.0131248	-0.0444657	-0.0209051	-0.0411551	-0.00610355	-0.0186228	-0.0919792	-0.0362821	-0.0266826	-0.0245973	-0.14995	-0.0116142	-0.0295396	-0.00662946	-0.026732	-0.0208308	-0.0276509
LP_yang	1.00201	0.984511	1.00338	1.00236	1.00562	1.00126	1.00021	1.00253	1.00256	0.99362	0.966655	1.00138	1.00326	0.997678	0.989991	1.00124	1.00239	1.00042	0.951908	1.00069	1.00371	1.00288	0.56739	0.910888	0.99551	1.00254	1.00067	0.981336	0.555224
TP_yang	-0.00702647		-0.00911893	-0.0118242	-0.0255692	-0.0134482	-0.0444571	-0.00499417	-0.0056599	-0.0235738	-0.042444		-0.0362118	-0.0158364	-0.055981	-0.00412518	-0.0371714	-0.0539463	-0.0120761	0.0257696	-0.0241074	-0.00603958	-0.0412267	-0.0574414	-0.0733111	-0.00633734	-0.0229637	-0.0319023	-0.188935
deposition								0.00434399	0.00232286			0.00546665	0.00378415	0.00562493		0.00494906				0.00528721		0.00367749
init_recovery	-0.0159229	-0.0377955	-0.009368	-0.0340838	-0.0149319	-0.0500667	-0.00908545	-0.00774493	-0.00618651	-0.0135157	-0.0248321	-0.044285	-0.0100723	-0.0424674	-0.0175362	-0.0397596	-0.00354555	-0.0144448	-0.0924311	-0.0356676	-0.024251	-0.0232726	-0.153683	-0.0108096	-0.0241237	-0.00581893	-0.0247621	-0.0190988	-0.0220375
runoff
fertilizer	0.0262247	0.152155		0.0133784	0.00931887	0.0225461	0.0226865			0.0844632	0.2101	0.0427372		0.0805943	0.0865315	0.0377027	0.00287851		0.242125				0.646585	0.287944			0.0623735	0.169546	0.634829
manure	0.00904439	0.0270076	0.0273043	0.0697274	0.066959	0.0606574	0.0658321	0.0103675	0.011636	0.0172667	0.0608352	0.0565284	0.0737247	0.0630774	0.0657973	0.0271204	0.0534864	0.115242	0.0996106	0.0365018	0.0995251	0.0617277	0.207004	0.0208706	0.157178	0.0118291	0.0577007	0.0491557	0.138062
LP-2000	Canada	USA	Mexico	Rest_Central_America	Brazil	Rest_South_America	Northern_Africa	Western_Africa	Eastern_Africa	South_Africa	Western_Europe	Central_Europe	Turkey	Ukraine_region	Central_Asia	Russia+	Middle_East	India+	Korea	China+	South_East_Asia	Indonesia	Japan	Oceania	Rest_Southern_Asia	Rest_Southern_Africa	World	France	NL
μLS	0.0547321		0.0324887	0.0110084	0.143631	0.0490425	0.0961703	-0.00995958	0.0194689	0.132985	0.012541	0.0258831	0.127877	0.175429	0.19078	0.115974	0.151812	0.0861378	0.318861	0.24768	0.030861	-0.0235495	0.445752	0.208916	0.100679		0.0918619	-0.0160463	0.0630448
fr_weathering	0.0696058	0.0356757	0.0408363	0.0229308	0.0150381	0.0405174	0.0444172	0.0390882	0.0316214	0.0438414	0.0238984	0.0285804	0.0461158	0.034023	0.064644	0.053538	0.0528221	0.0507259			0.0177757	0.0280654		0.0369157	0.0461005	0.0291413	0.0371637	0.0227696
fs	0.0584932	0.103381	0.0427461	0.0315622	0.122802	0.06678	0.0278331	0.0063543	0.0130313	0.0596371	0.0612357	0.0589485	0.0739295	0.0577047	0.043584	0.0335592	0.0576526	0.0671555	0.158028	0.18636	0.0953402	0.0697321	0.194905	0.0952224	0.0741517	0.0106884	0.0772108	0.0759591	0.0470642
fm	0.0111743	0.035585	0.0309968	0.0299342	0.050538	0.0523903	0.0292555	0.0168104	0.0234767	0.0217632	0.0306824	0.0288337	0.025903	0.0405502	0.0236422	0.0227673	0.0271741	0.0343497	0.0628857	0.0645471	0.0417631	0.048582	0.0892615	0.0211702	0.0544519	0.0133034	0.0359316	0.0286119	0.12722
agri_2_natural_years
max_uptake	-0.116832	-0.216982	-0.102092	-0.0774492	-0.13076	-0.0826677	-0.0267991	-0.0489956	-0.0419966	-0.0624788	-0.155879	-0.173103	-0.0936179	-0.16485	-0.0726571	-0.103542	-0.0429842	-0.10542	-0.158595	-0.174697	-0.156309	-0.202045	-0.150522	-0.0482529	-0.114736	-0.042914	-0.122097	-0.211724	-0.155384
fr_mobile	-0.0830073	-0.181565	-0.0753512	-0.0918569	-0.0901828	-0.140239	-0.0383433	-0.0449079	-0.0334788	-0.0718769	-0.137673	-0.175651	-0.074638	-0.13237	-0.073718	-0.0760847	-0.0455804	-0.0837805	-0.19364	-0.150361	-0.148992	-0.186981	-0.162422	-0.0501765	-0.112197	-0.0348842	-0.107069	-0.163172	-0.161994
LP_yang	0.977416	0.892495	0.989395	0.988715	0.927439	0.965902	0.989569	1.00167	1.00236	0.962738	0.928554	0.913333	0.966443	0.909523	0.952752	0.973918	0.97462	0.973215	0.699227	0.816434	0.943658	0.933604	0.423808	0.929213	0.953375	1.002	0.956414	0.896839	0.736062
TP_yang	-0.0393266	-0.0724857	-0.0284325	-0.031108	-0.0715149	-0.0455692	-0.0884188	-0.00875191	-0.019817	-0.0959763	-0.134432	-0.139961	-0.0809479	-0.173875	-0.105469	-0.0876949	-0.0790372	-0.0886494	-0.152852	-0.0614551	-0.0293706	-0.0125896	-0.172294	-0.106192	-0.111319	-0.0134869	-0.0781856	-0.135967	-0.414845
deposition								0.00943265	0.00399256													0.0113837
init_recovery	-0.0796952	-0.175338	-0.0731142	-0.0902189	-0.0922336	-0.137703	-0.0334188	-0.043169	-0.031278	-0.0669738	-0.128164	-0.165533	-0.0701736	-0.12203	-0.0685847	-0.0705504	-0.041443	-0.0782917	-0.188737	-0.148439	-0.147248	-0.186409	-0.157745	-0.0452905	-0.105574	-0.033529	-0.10246	-0.153903	-0.135837
runoff
fertilizer	0.17209	0.352639	0.121928	0.105261	0.318095	0.171184	0.0990427	0.014409	0.0312151	0.226946	0.316764	0.30928	0.205274	0.298369	0.215671	0.16147	0.160296	0.163199	0.604817	0.467322	0.238674	0.193957	0.775301	0.306684	0.19436	0.0303521	0.240335	0.358631	0.413285
manure	0.0256737	0.0705554	0.0649907	0.0864016	0.0954483	0.112334	0.0852522	0.0313326	0.0483995	0.0443863	0.0989413	0.0961544	0.0890295	0.13125	0.0516327	0.0651955	0.0715533	0.139804	0.15301	0.131471	0.121318	0.0926564	0.242898	0.0459085	0.191157	0.0268949	0.095822	0.0815476	0.389238
SP-1950	Canada	USA	Mexico	Rest_Central_America	Brazil	Rest_South_America	Northern_Africa	Western_Africa	Eastern_Africa	South_Africa	Western_Europe	Central_Europe	Turkey	Ukraine_region	Central_Asia	Russia+	Middle_East	India+	Korea	China+	South_East_Asia	Indonesia	Japan	Oceania	Rest_Southern_Asia	Rest_Southern_Africa	World	France	NL
μLS	-0.00121542	-0.00279112	-0.00141227	-0.00104936	0.000874773	0.00358541	-0.0064153		-0.000410121	-0.00753599	-0.0155732	0.0032691	-0.00308319	-0.00162806	-0.00895334		-0.00376663	-0.003629	-0.0103092	0.00718675	0.00197369	0.00161993	-0.0672722	-0.0248043	-0.00358534	-0.00054433	-0.00298505	-0.0100556	-0.119797
fr_weathering	0.0175374	0.017292	0.00821675	0.00665894	0.0089554	0.0131573	0.0135005	0.00793111	0.00801801	0.0097353	0.0128969	0.0123278	0.0159527	0.0151519	0.0177868	0.0155518	0.0130781	0.0172041	0.00779775	0.0118451	0.0080902	0.0104695	0.00772292	0.0139793	0.0193875	0.00756798	0.0141989	0.0152192	0.0188957
fs	-0.00074662	-0.00461126		-0.000688711	-0.000477624		-0.000870302			-0.00296211	-0.00871248	-0.00154563		-0.00238997	-0.00242872	-0.00115802			-0.00928802				-0.039144	-0.00962335			-0.00212598	-0.00672309	-0.0497853
fm			-0.000869284	-0.00365803	-0.00272081	-0.00209462	-0.00268328		-0.000344193	-0.000492577	-0.00169747	-0.001233	-0.00237005	-0.00132292	-0.00143656		-0.00185008	-0.00360698	-0.00258866		-0.00307809	-0.00147438	-0.0122004		-0.00537903	-0.000359626	-0.00135624	-0.000968428	-0.00997491
agri_2_natural_years					-0.000395345	-0.00393028
max_uptake	-0.0184776	-0.0467489	-0.00861655	-0.0155213	-0.0191614	-0.0239557	-0.00681262	-0.00786636	-0.0069257	-0.00850098	-0.0434381	-0.036091	-0.0166601	-0.0343084	-0.0123686	-0.0219823	-0.00644981	-0.0212105	-0.0479409	-0.0436905	-0.0337853	-0.0413186	-0.0880153	-0.0119117	-0.0314311	-0.00621659	-0.0274625	-0.0458067	-0.0809419
fr_mobile	-0.00543122	-0.0135846	-0.00193999	-0.0116311	-0.00434861	-0.0157873	-0.00423925	-0.00300486	-0.00240114	-0.003928	-0.0127875	-0.0163306	-0.00439236	-0.0146571	-0.00591152	-0.0130331	-0.00186914	-0.00634315	-0.031289	-0.0149191	-0.00933335	-0.00820615	-0.0829268	-0.00406704	-0.0113275	-0.00205731	-0.00972454	-0.0102139	-0.0238993
LP_yang	-0.0692827	-0.0784539	-0.0700767	-0.106711	-0.0956868	-0.0966594	-0.112106	-0.0855651	-0.0863767	-0.0888391	-0.111032	-0.0922143	-0.0912022	-0.0795179	-0.0747707	-0.0784905	-0.102038	-0.088258	-0.09688	-0.102405	-0.102143	-0.0860341	-0.103376	-0.081388	-0.116693	-0.0867733	-0.0892117	-0.104439	-0.135584
TP_yang	1.00041	0.993386	1.00033	0.996055	0.997781	0.997316	0.996766	0.999324	0.999316	0.995712	0.983617	0.996331	0.999644	0.996574	0.998326	0.998827	0.998851	0.99917	0.982415	0.996412	0.995933	0.99803	0.885768	0.984913	0.993713	0.99924	0.996663	0.988553	0.803565
deposition							0.00114261	0.00126147	0.000592718				0.00142951		0.00050933		0.000906233	0.00106736							0.00133721
init_recovery	-0.00549188	-0.0135035	-0.0020359	-0.0118702	-0.00477607	-0.0159581	-0.00455455	-0.00306955	-0.00242352	-0.0040175	-0.0128642	-0.0163214	-0.00461343	-0.0146889	-0.00612384	-0.0130902	-0.00210561	-0.00663689	-0.0313924	-0.0148819	-0.00951286	-0.00828507	-0.0833537	-0.00411716	-0.0118265	-0.00211843	-0.00983071	-0.0102788	-0.0249918
runoff							-0.000933983			-0.000419738			-0.00110999		-0.00102171		-0.00113173						-0.00507661	-0.00185378
fertilizer	0.00643613	0.0362762	0.000462772	0.00349566	0.00209758	0.00395633	0.00802002			0.0244273	0.0715084	0.00966133		0.0187737	0.0206887	0.00895978	0.00101774		0.0690477			0.000817833	0.288186	0.0846386			0.0171046	0.0523169	0.449926
manure	0.00520361	0.0135265	0.0142592	0.0435411	0.0421711	0.0326232	0.0446942	0.00640046	0.00671957	0.00970403	0.0430291	0.0330173	0.0470862	0.034001	0.0426067	0.0149142	0.0345224	0.0678374	0.0622896	0.0226702	0.0651182	0.0360708	0.198277	0.0109828	0.10521	0.00655946	0.0329863	0.0346011	0.167311
SP-2000	Canada	USA	Mexico	Rest_Central_America	Brazil	Rest_South_America	Northern_Africa	Western_Africa	Eastern_Africa	South_Africa	Western_Europe	Central_Europe	Turkey	Ukraine_region	Central_Asia	Russia+	Middle_East	India+	Korea	China+	South_East_Asia	Indonesia	Japan	Oceania	Rest_Southern_Asia	Rest_Southern_Africa	World	France	NL
μLS	-0.00496859	-0.00385521	-0.00383563	-0.00248681	-0.0206716	0.00172325	-0.0125075	0.000944556	-0.00164938	-0.0170032	-0.0102985	-0.0148497	-0.013873	-0.024305	-0.0199019	-0.0119066	-0.01754	-0.00819191	-0.0598541	-0.0298897		0.00286106	-0.113638	-0.0214916	-0.0118067		-0.0109189	-0.0100669	-0.0316663
fr_weathering	0.0343747	0.0219765	0.0178947	0.0111031	0.00744359	0.0161692	0.0216634	0.014464	0.0122008	0.0198784	0.0193795	0.0205093	0.0246524	0.0245652	0.0290981	0.0272117	0.0233821	0.0306432	0.0127334	0.0119842	0.0110776	0.0149899	0.00789233	0.0169883	0.0273366	0.00929722	0.0209055	0.0203481	0.0187979
fs	-0.0051467	-0.0155873	-0.00489157	-0.00512731	-0.0177318	-0.00659476	-0.00371012		-0.00119578	-0.00806216	-0.0149232	-0.0158205	-0.00798749	-0.0114036	-0.00592984	-0.00446761	-0.00682451	-0.00620874	-0.0348451	-0.0270185	-0.0105451	-0.00813668	-0.0567464	-0.00991062	-0.00889475	-0.00114236	-0.0102331	-0.0193026	-0.0178683
fm			-0.00177909	-0.00306424	-0.00556042	-0.00545462	-0.00351906	-0.000800231	-0.00182601	-0.00117308			-0.00155681				-0.00246725	-0.00207249	-0.00590338	-0.0066771	-0.00266674		-0.0169598	-0.00123668	-0.00555396	-0.000722146	-0.00219647		-0.029168
agri_2_natural_years						-0.00202435
max_uptake	-0.0456088	-0.0886064	-0.0337697	-0.0316052	-0.0380528	-0.0291746	-0.0120789	-0.0171127	-0.0147348	-0.023348	-0.0922445	-0.087683	-0.0377366	-0.0790861	-0.0262837	-0.0445767	-0.0163664	-0.0478169	-0.0916328	-0.0673892	-0.0620775	-0.0725228	-0.11969	-0.0180204	-0.0538201	-0.0131018	-0.051467	-0.109548	-0.135059
fr_mobile	-0.0245928	-0.0533982	-0.0219597	-0.0343403	-0.0237844	-0.0403112	-0.0130182	-0.0124986	-0.010116	-0.0229103	-0.0551297	-0.0677761	-0.0227631	-0.0525157	-0.023353	-0.030285	-0.0126543	-0.0266911	-0.0952108	-0.0480888	-0.0425193	-0.0423125	-0.123744	-0.0130325	-0.0379707	-0.0090716	-0.0341997	-0.058456	-0.0829263
LP_yang	-0.0871689	-0.118721	-0.101411	-0.123664	-0.111342	-0.123938	-0.120451	-0.0956699	-0.0977434	-0.107936	-0.146856	-0.136548	-0.105092	-0.113907	-0.0914688	-0.0965085	-0.112177	-0.107987	-0.132132	-0.133519	-0.118478	-0.101115	-0.111849	-0.0953152	-0.137132	-0.0963738	-0.113912	-0.146171	-0.192796
TP_yang	0.989517	0.952782	0.989905	0.984168	0.97253	0.985191	0.989049	0.998195	0.997441	0.973049	0.922152	0.926031	0.984622	0.932731	0.972711	0.977669	0.989358	0.988553	0.83268	0.958501	0.979308	0.980646	0.531134	0.970866	0.975912	0.996425	0.974772	0.911907	0.676275
deposition							0.00203913	0.00236107	0.00101787				0.0023046				0.00158734	0.0019989
init_recovery	-0.0247969	-0.0538526	-0.0222126	-0.0348926	-0.0258233	-0.0408043	-0.0137013	-0.0126449	-0.0101257	-0.0235694	-0.0563848	-0.0688351	-0.0231494	-0.053347	-0.0239189	-0.0306811	-0.0131106	-0.0270922	-0.096913	-0.048461	-0.0428306	-0.0425891	-0.126267	-0.0135061	-0.0386803	-0.00920589	-0.0347439	-0.0599451	-0.087946
runoff			-0.00115046	-0.00198817	-0.00169527	-0.00162588	-0.00252685			-0.00270757	-0.00489555		-0.00422713		-0.00195296		-0.00268568		-0.00840697				-0.0184116	-0.00449028			-0.00180865	-0.003989
fertilizer	0.0623837	0.163388	0.0461227	0.0509035	0.108445	0.0436919	0.0484375	0.00510682	0.00827078	0.121899	0.235547	0.228524	0.0715505	0.222883	0.133513	0.106591	0.055	0.0398692	0.40366	0.135648	0.0612816	0.0657796	0.705606	0.134515	0.0612193	0.013124	0.101741	0.257928	0.486612
manure	0.0151001	0.041339	0.0393119	0.061295	0.0614354	0.0618691	0.0618152	0.0173987	0.028929	0.0260482	0.0883221	0.0777691	0.0665883	0.106359	0.0311065	0.0450966	0.0474649	0.10189	0.124619	0.0808589	0.0775492	0.0496036	0.282093	0.0279081	0.134554	0.0151324	0.0630761	0.0722354	0.428222
UPTAKE-1950	Canada	USA	Mexico	Rest_Central_America	Brazil	Rest_South_America	Northern_Africa	Western_Africa	Eastern_Africa	South_Africa	Western_Europe	Central_Europe	Turkey	Ukraine_region	Central_Asia	Russia+	Middle_East	India+	Korea	China+	South_East_Asia	Indonesia	Japan	Oceania	Rest_Southern_Asia	Rest_Southern_Africa	World	France	NL
μLS					-0.0170388	-0.0643764	0.0375619			0.0354278	0.0330689				0.0447405		0.0188133		0.0358495	-0.0248377			0.0840709	0.0505004				0.0229451	0.0679207
fr_weathering	0.0243203	0.0230534	0.0423725			0.0369723	0.0288191	0.0204889		0.023667	0.0156348	0.0280693	0.0188491	0.0296328	0.0330108	0.035772	0.0211649	0.0203726		0.0213218				0.0201641	0.0194903	0.0172147	0.0232538	0.0137236
fs		0.0187654									0.0214822								0.0292884				0.0548134	0.0230744				0.0169868	0.0323823
fm	-0.0200714	-0.0179971								-0.0208248														-0.0207984		-0.0174983
agri_2_natural_years			0.116142	0.0285647
max_uptake	0.877537	0.888317	0.865894	0.662067	0.903714	0.645459	0.69005	0.812399	0.844599	0.77514	0.903795	0.781428	0.89801	0.805313	0.798443	0.699647	0.875003	0.874969	0.707415	0.8387	0.887192	0.939973	0.617108	0.867897	0.846966	0.864145	0.846204	0.934258	0.933568
fr_mobile	0.253787	0.235461	0.207826	0.475615	0.210352	0.423124	0.420936	0.314016	0.289257	0.354095	0.223853	0.338246	0.235696	0.323177	0.336142	0.403151	0.259608	0.257446	0.425739	0.28907	0.255394	0.188226	0.479011	0.26865	0.292776	0.268877	0.288983	0.175331	0.169012
LP_yang	0.208041	0.187703	0.129218	0.221537	0.202168	0.417217	0.311363	0.284208	0.247275	0.263398	0.134006	0.304121	0.173346	0.268248	0.239196	0.34539	0.203779	0.210056	0.200911	0.26515	0.169137	0.0798689	0.122467	0.160243	0.221767	0.225337	0.228287	0.118186	0.0651766
TP_yang							-0.0290074																						-0.022848
deposition
init_recovery	0.252803	0.233942	0.201803	0.478174	0.221621	0.424889	0.423458	0.313966	0.284664	0.354311	0.223133	0.336462	0.234691	0.321548	0.336167	0.402403	0.258839	0.255909	0.42708	0.287721	0.254446	0.187905	0.483338	0.268898	0.291062	0.268379	0.288194	0.174331	0.168673
runoff
fertilizer		0.0476929	0.259331				0.0203239			0.0466911	0.0614192	0.0240853		0.0326386	0.0496434	0.0219977			0.0849051				0.157772	0.0637263			0.0293088	0.0467958	0.10016
manure				0.0692645	0.0329951	0.036188	0.0739673				0.0174492	0.0308088	0.0257621	0.0282977	0.0205314		0.0301734	0.0388965	0.0320083	0.0226743	0.0300975		0.0562135		0.0578733		0.0220692		0.016873
UPTAKE-2000	Canada	USA	Mexico	Rest_Central_America	Brazil	Rest_South_America	Northern_Africa	Western_Africa	Eastern_Africa	South_Africa	Western_Europe	Central_Europe	Turkey	Ukraine_region	Central_Asia	Russia+	Middle_East	India+	Korea	China+	South_East_Asia	Indonesia	Japan	Oceania	Rest_Southern_Asia	Rest_Southern_Africa	World	France	NL
μLS	0.0334686		0.0246092		0.0978811	-0.0266455	0.079876			0.0790937		0.0387742	0.0751427	0.118731	0.115067	0.0796147	0.101246	0.0482112	0.144917	0.107134	0.0232128		0.165751	0.0818059	0.048823		0.0496828	0.0235339	0.0591715
fr_weathering	0.049737	0.0442324	0.0349403	0.0237259	0.0246772	0.0433974	0.0365839	0.0310506	0.0243191	0.0344359	0.036284	0.0379892	0.0394906	0.0425127	0.0433151	0.0420917	0.044193	0.0424319	0.0270911	0.0306949	0.0269046	0.0260548	0.0236432	0.0362632	0.0395953	0.0256629	0.0370746	0.0353859	0.042269
fs	0.0327136	0.0710443	0.0261014	0.0256344	0.0905265	0.0492837	0.02529			0.0354071	0.0531698	0.0445411	0.0420561	0.0319952	0.0310833		0.0423996	0.0358498	0.0754177	0.0909805	0.0547426	0.0316741	0.0783013	0.0445509	0.0353948		0.0554484	0.06609
fm	-0.0229658					0.0203952																							0.0535635
agri_2_natural_years
max_uptake	0.542419	0.454082	0.597698	0.427415	0.591746	0.287289	0.376139	0.471273	0.567096	0.4286	0.374311	0.340433	0.519601	0.446957	0.431663	0.542441	0.442079	0.499294	0.38096	0.527093	0.426319	0.432062	0.486977	0.445202	0.429764	0.534055	0.471813	0.426138	0.335676	0.287289	0.597698
fr_mobile	0.4851	0.487179	0.478382	0.556231	0.424414	0.5601	0.547687	0.50889	0.480416	0.538309	0.508296	0.508621	0.499102	0.48611	0.539777	0.478329	0.52339	0.503315	0.527035	0.478447	0.544089	0.572557	0.482573	0.528197	0.531979	0.484724	0.504501	0.4787	0.501652	0.424414	0.572557
LP_yang	0.388545	0.411399	0.319958	0.351694	0.276649	0.484675	0.418657	0.473211	0.404751	0.362143	0.417593	0.479541	0.351347	0.436955	0.332058	0.398269	0.385926	0.394769	0.261514	0.258139	0.348772	0.28828	0.138622	0.360934	0.401321	0.437058	0.373561	0.407632	0.39454	0.138622	0.484675
TP_yang		-0.02058			-0.0315963		-0.0561035			-0.0351213	-0.0919857	-0.0808079	-0.0272844	-0.0810243	-0.0400686	-0.0322457	-0.0307529	-0.0313073	-0.0516285				-0.0574635	-0.0282902	-0.0404283		-0.0306798	-0.0819907	-0.205968
deposition
init_recovery	0.48644	0.490064	0.480394	0.562254	0.455778	0.566424	0.554908	0.509882	0.476956	0.54431	0.514373	0.515476	0.502573	0.488852	0.54493	0.47957	0.527033	0.505601	0.534948	0.482488	0.548146	0.577478	0.49018	0.53292	0.535654	0.486385	0.509703	0.489264	0.50687	0.455778	0.577478
runoff
fertilizer	0.0976426	0.233301	0.0790613	0.0965973	0.235953	0.116182	0.0908349		0.0231669	0.133355	0.263146	0.233452	0.121369	0.172093	0.144982	0.0887295	0.12067	0.0965991	0.284501	0.237033	0.144315	0.0909858	0.320722	0.14115	0.104854	0.0320642	0.178539	0.286211	0.220401
manure		0.039604	0.0371359	0.0658301	0.0624027	0.0769058	0.0790636	0.030749	0.04173	0.0285314	0.0795908	0.0693117	0.0492053	0.0853564	0.0338441	0.039168	0.0447472	0.0744663	0.0673122	0.0550976	0.0626232	0.0449854	0.0942449	0.0199906	0.102631	0.0214923	0.0578679	0.0585135	0.221017
